# Supplementary material for: Base free transfer hydrogenation using a covalent triazine framework based catalyst
Source: Royal Society of Chemistry journal article supplement (doi:10.1039/c7ce00561j), 2017-01-01
Supplement: c7ce00561j1.pdf [file c7ce00561j1.pdf]

## Supporting Information

### Covalent Triazine Framework synthesis

To synthesise CTF, a glass ampoule was charged with 2,6-pyridinedicarbonitrile (0.124 g, 0.96 mmol) and anhydrous  $\text{ZnCl}_2$  (0.664 g, 4.8 mmol) in a glovebox. The ampoule was flame sealed and the mixture was heated at  $500^\circ\text{C}$  for 48 h and then cooled to room temperature. The product was consecutively washed in 5M HCl at  $100^\circ\text{C}$ , in  $\text{NH}_4\text{OH}$  at  $60^\circ\text{C}$ , in  $\text{H}_2\text{O}$  at  $100^\circ\text{C}$  and then in THF at  $60^\circ\text{C}$ , each step overnight. The washing steps might seem excessive, but were, as we found, required to remove  $\text{ZnCl}_2$ . Finally, the powder was dried in vacuum at  $180^\circ\text{C}$  overnight.

### Catalyst Synthesis

A mixture of meso-CTF polymer (480 mg) and  $[\text{Cp}^*\text{Ir}(\text{Cl})_2]_2$  (40 mg) was placed in a Schlenk flask in a glovebox. Outside of the glovebox, degassed water (40 mL) was added with a syringe to the flask under a continuous Ar flow. The mixture was stirred overnight and filtered. The powder was further washed with a mixture of triflic acid (HOTf) (300 mg) and a 1:1 (volume) DMF/water mixture (50 mL) to remove the chloride ions. Finally, the powder was stirred in water at  $50^\circ\text{C}$  for another 12 h, before being filtered and dried under vacuum at  $50^\circ\text{C}$ .

### CTF Characterisation

#### TGA

Thermogravimetric analysis (TGA) was performed on a Mettler Toledo TGA/SDTA851e instrument, where 11-20 mg of sample was screened for the change in mass while heated from  $30^\circ\text{C}$  to  $1000^\circ\text{C}$  with a heating rate of  $2^\circ\text{C min}^{-1}$  under air flow.

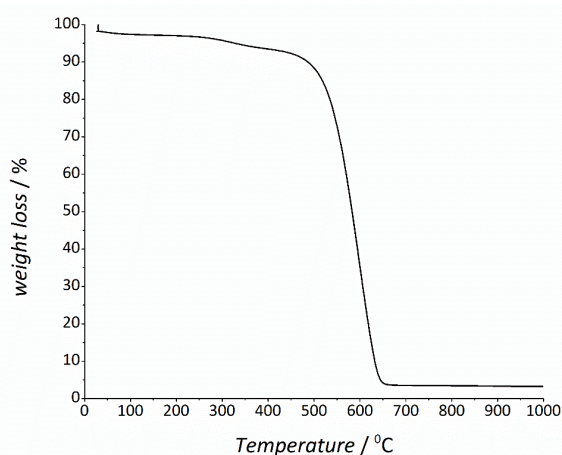

## Nitrogen Adsorption of CTF support

Nitrogen (99.999 %) adsorption measurements were done at  $-196\text{ }^{\circ}\text{C}$  using a Tristar II 3020 Micromeritics instrument. Sample degassing was done at  $150\text{ }^{\circ}\text{C}$ .

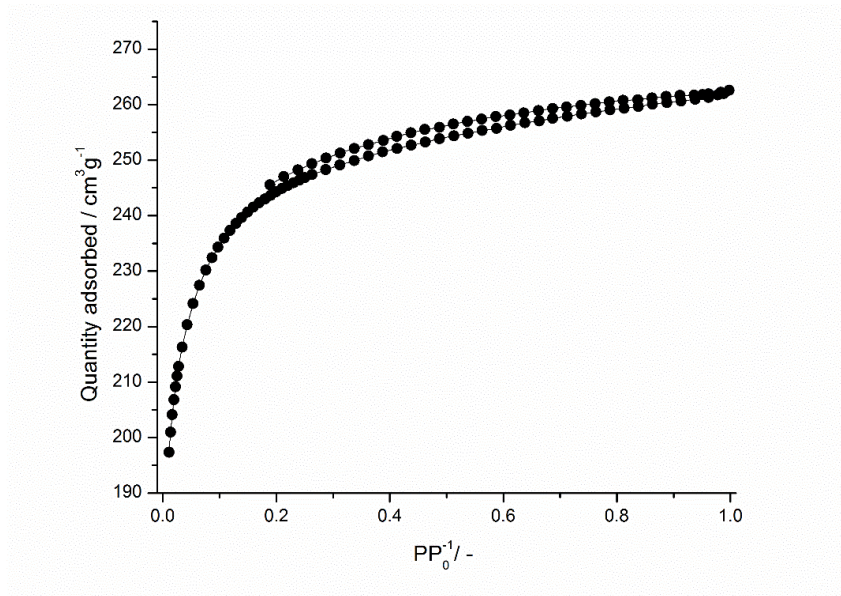

## Catalyst Characterisation

XPS

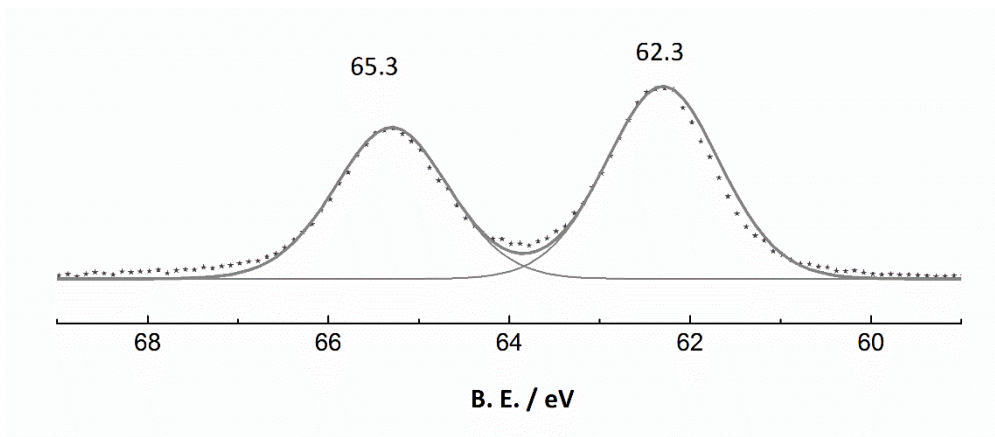

Ir XPS analysis of the spent catalyst

## SEM/EDX of Ir@CTF

Scanning electron microscopy (SEM) images were recorded using a JEOL JSM-6010LA with a standard beam potential of 10 kV and an Everhart-Thornley detector. X-ray microanalysis (SEM/EDX) confirmed the elemental composition of the samples by the scanning electron microscopy (SEM) coupled with a dispersive X-ray microanalysis system (EDX) with a Silicon-drift detector.

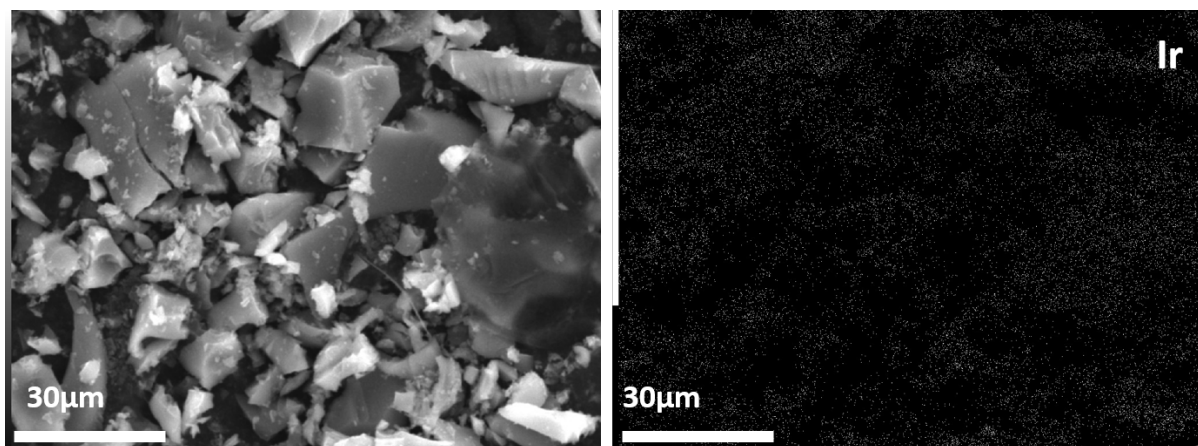

## Transfer Hydrogenation

1-octene-3-ol (40 mg, 0.31 mmol) was contacted with the Ir@CTF (2.4 wt% of Ir) material (10 mg, corresponding to 0.40 mol% Ir with respect to the substrate) in toluene or *iso*-propanol (1 mL) at 120°C under an inert atmosphere ( $N_2$ , 2 bar). No further additives were used in the reaction. For the recycling, the solid was recovered by filtration, washed with *i*-PrOH, and dried at room temperature.
